# Supplementary material for: Identification of Selective Inhibitors of the Potassium Channel Kv1.1–1.2(3) by High-Throughput Virtual Screening and Automated Patch Clamp
Source: PubMed Central journal article supplement (PMC3525944; doi:10.1002/cmdc.201100600), 2012-03-30
Supplement: cmdc0007-1775-SD1.pdf [file cmdc0007-1775-SD1.pdf]

## Supporting Information

© Copyright Wiley-VCH Verlag GmbH & Co. KGaA, 69451 Weinheim, 2012

### **Identification of Selective Inhibitors of the Potassium Channel Kv1.1–1.2<sub>(3)</sub> by High-Throughput Virtual Screening and Automated Patch Clamp**

Sören J. Wacker,<sup>[a]</sup> Wiktor Jurkowski,<sup>[b]</sup> Katie J. Simmons,<sup>[c]</sup> Colin W. G. Fishwick,<sup>[c]</sup>  
A. Peter Johnson,<sup>[c]</sup> David Madge,<sup>[d]</sup> Erik Lindahl,<sup>[b, e]</sup> Jean-Francois Rolland,<sup>\*,[d]</sup> and  
Bert L. de Groot<sup>\*,[a]</sup>

cmdc\_201100600\_sm\_miscellaneous\_information.pdf

**Table S1:** Original ranks of the 14 hits according to the implementations A and B and the three used consensus scoring methods, rank2max, rank2number and rank2rank.

| ID | Implementation A |             |           | Implementation B |             |           | IC50 |
|----|------------------|-------------|-----------|------------------|-------------|-----------|------|
|    | rank2max         | rank2number | rank2rank | rank2max         | rank2number | rank2rank |      |
| 1  | 94               | 216         | 55        | n.e.             | n.e.        | n.e.      | 0.71 |
| 2  | 121              | 373         | 225       | n.e.             | n.e.        | n.e.      | 0.79 |
| 3  | 86               | 575         | 181       | n.e.             | n.e.        | n.e.      | 1.41 |
| 4  | 170              | 228         | 208       | n.e.             | n.e.        | n.e.      | 1.62 |
| 5  | 72               | 455         | 132       | n.e.             | n.e.        | n.e.      | 2.98 |
| 6  | 91               | 410         | 91        | n.e.             | n.e.        | n.e.      | 4.07 |
| 7  | 80               | 583         | 152       | 8                | 35          | 10        | 1.53 |
| 8  | 2399             | 2084        | 1137      | 68               | 184         | 115       | 0.58 |
| 9  | 418              | 1086        | 333       | 9                | 70          | 23        | 0.93 |
| 10 | 323              | 471         | 315       | 7                | 23          | 8         | 1.66 |
| 11 | 1204             | 782         | 352       | 133              | 88          | 73        | 2.71 |
| 12 | 3563             | 1805        | 1401      | 137              | 112         | 53        | 3.7  |
| 13 | 267              | 740         | 444       | 13               | 51          | 30        | 3.77 |
| 14 | 303              | 754         | 354       | 112              | 78          | 100       | 5.94 |

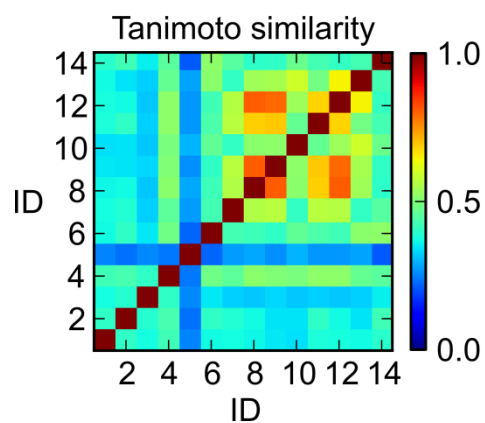

**Figure S1.** Tanimoto-similarity of the 14 active compounds.

**Table S2:** BEDROC and AROC values according to scores and subscores of Vina, Glide, eHiTS and FlexX.

| Score/Sub-Score         | BEDROC | AROC   |
|-------------------------|--------|--------|
| Autodock-Vina           | 0.5191 | 0.706  |
| FlexX_Ambig-Score       | 0.2356 | 0.5589 |
| FlexX_AnzMatch          | 0.1066 | 0.4086 |
| FlexX_AvgVolume         | 0.1325 | 0.5001 |
| FlexX_Clash-Score       | 0.0422 | 0.392  |
| FlexX_Lipo-Score        | 0.5898 | 0.7029 |
| FlexX_Match-Score       | 0.0232 | 0.3718 |
| FlexX_MaxVolume         | 0.0904 | 0.4485 |
| FlexX_Rot-Score         | 0.1874 | 0.4307 |
| FlexX_Total-Score       | 0.1094 | 0.4387 |
| ChemScore_Clash-Score   | 0.1049 | 0.4641 |
| ChemScore_FragNo        | 0.239  | 0.3545 |
| ChemScore_Lipo-Score    | 0.5485 | 0.7312 |
| ChemScore_Match-Score   | 0.0106 | 0.327  |
| ChemScore_MaxVolume     | 0.1068 | 0.4917 |
| ChemScore_Rot-Score     | 0.2193 | 0.4657 |
| ChemScore_Total-Score   | 0.3361 | 0.6317 |
| Glide_XP-Electro        | 0.0256 | 0.3793 |
| Glide_XP-HBond          | 0.0215 | 0.3804 |
| Glide_XP-LipophilicEvdW | 0.6058 | 0.7254 |
| Glide_XP-Penalties      | 0.1741 | 0.4052 |
| Glide_XP-PhobicPenal    | 0.2063 | 0.5101 |
| Glide_XP-RotPenal       | 0.0696 | 0.5022 |
| Glide_XP-Sitemap        | 0.3578 | 0.6    |
| Glide_ecoul             | 0.0259 | 0.3851 |
| Glide_einternal         | 0.1101 | 0.392  |
| Glide_emodel            | 0.5611 | 0.7073 |
| Glide_energy            | 0.5393 | 0.6945 |
| Glide_evdw              | 0.67   | 0.7406 |
| Glide_gscore            | 0.3146 | 0.5475 |
| eHiTS_Energy            | 0.3355 | 0.6136 |
| eHiTS_Score             | 0.1648 | 0.5041 |
| eHiTS_Term-Coulomb      | 0.1632 | 0.5416 |
| eHiTS_Term-H_bond       | 0.0894 | 0.4321 |
| eHiTS_Term-Lcover       | 0.1312 | 0.4798 |
| eHiTS_Term-Lipophil     | 0.124  | 0.4542 |
| eHiTS_Term-LlogD        | 0.0861 | 0.3868 |
| eHiTS_Term-Rcharge      | 0.0529 | 0.3715 |
| eHiTS_Term-Rcover       | 0.2297 | 0.4745 |
| eHiTS_Term-RlogD        | 0.2451 | 0.5364 |
| eHiTS_Term-Rshape       | 0.298  | 0.5632 |
| eHiTS_Term-depth        | 0.4401 | 0.6932 |
| eHiTS_Term-entropy      | 0.0513 | 0.3396 |
| eHiTS_Term-family       | 0.4456 | 0.7025 |
| eHiTS_Term-other        | 0.2119 | 0.5413 |
| eHiTS_Term-pi_stack     | 0.2414 | 0.533  |
| eHiTS_Term-solvent      | 0.2521 | 0.6055 |
| eHiTS_Term-steric       | 0.3027 | 0.5495 |
| eHiTS_Term-strain       | 0.5824 | 0.7351 |

| <b>Table S3:</b> Inhibitors of Kv1.1 and Kv1.2. Sources: Drug Bank, Tocris Bioscience. NA stands for Data Not Available and "-" no indication of particular target |             |           |                    |                    |                                              |
|--------------------------------------------------------------------------------------------------------------------------------------------------------------------|-------------|-----------|--------------------|--------------------|----------------------------------------------|
| Name/INN                                                                                                                                                           | CAS         | Pubmed ID | Kv1.1<br>IC50 (µM) | Kv1.2<br>IC50 (µM) | Other targets/<br>IC50 (µM)                  |
| Nifedipine                                                                                                                                                         | 21829-25-4  | 7517498   | NA                 | NA                 | NA                                           |
| Amitriptyline                                                                                                                                                      | 50-48-6     | 17456683  | 22                 | -                  | Kv7.2/7.3<br>10                              |
| 4-Aminopyridine<br>Fampridine                                                                                                                                      | 504-24-5    | 19413590  | 170                | 230                | Kv1.4, Kv4.2                                 |
| Nerispidine                                                                                                                                                        | 119229-65-1 | 19413590  | 3.6                | 3.7                | NavX<br>11.9                                 |
| AM 92016 hydrochloride                                                                                                                                             | 178894-81-0 | 15967421  | NA                 | NA                 | NA                                           |
| KN-93                                                                                                                                                              | 139298-40-1 | 16368898  | -                  | 1                  | Kv1.4, Kv1.5, Kv2.1,<br>Kv3.2, Kv4.2<br>hERG |

## **Spectral Data**

MaxPeak: 100.00%  
Ret\_Time: 0.923 min

4532116

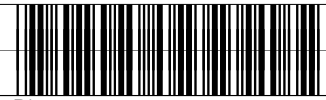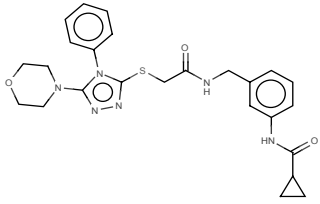

Mol Wt 492.593  
Exact Mass 492.22

| # | Time  | Area%  |
|---|-------|--------|
| 1 | 0.923 | 100.00 |

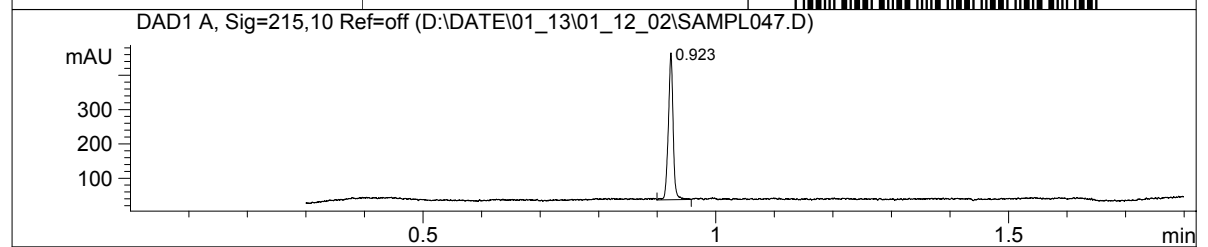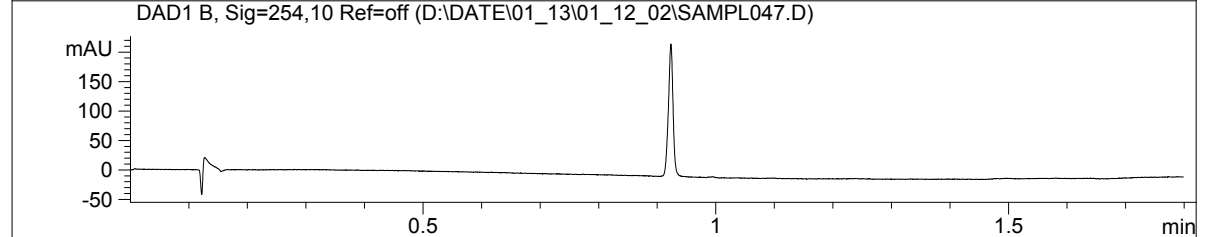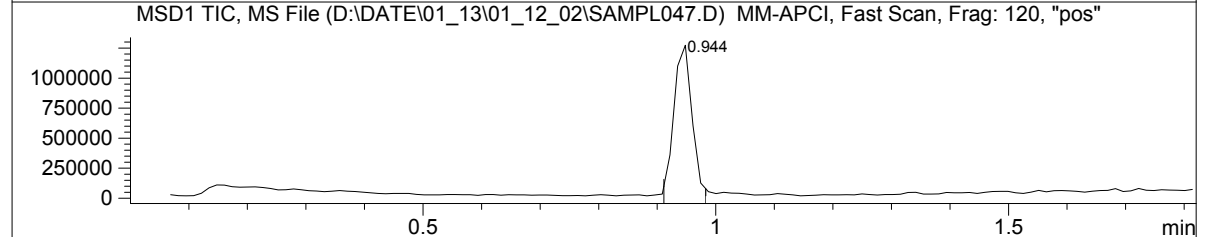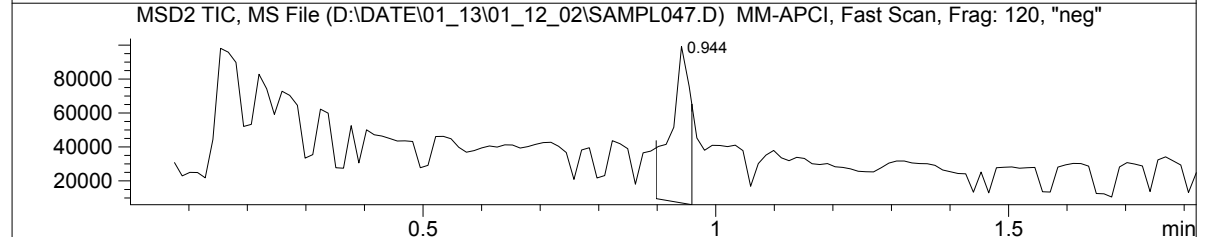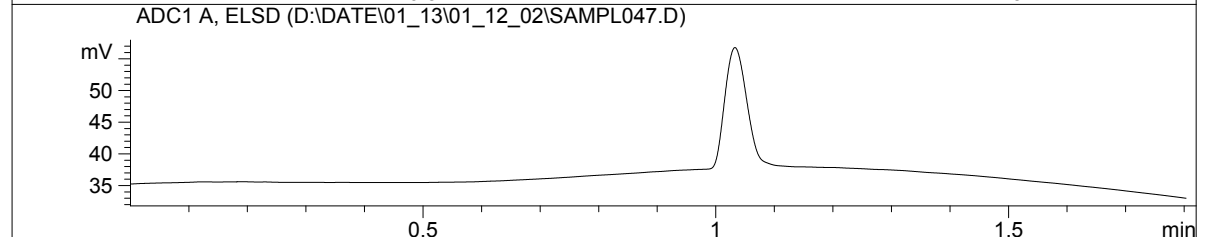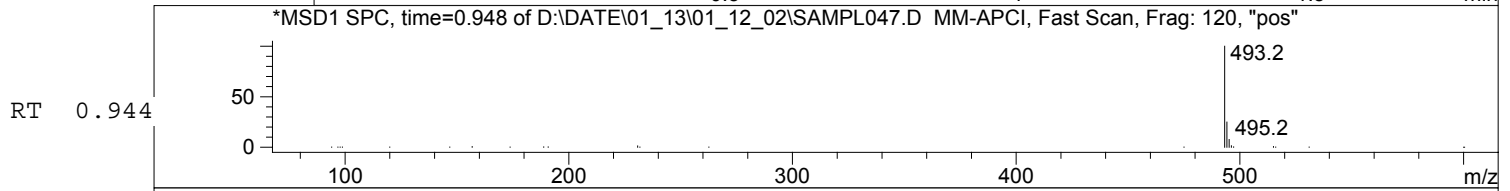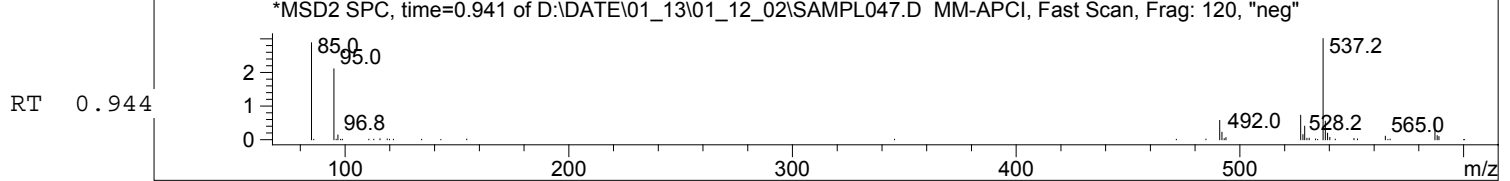

Compound ID: 1

MaxPeak: 95.39%  
Ret\_Time: 1.199 min

# 4532085

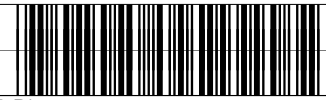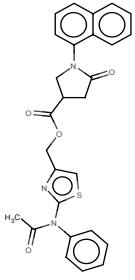

**Mol Wt** 485.554  
**Exact Mass** 485.16

| # | Time  | Area% |
|---|-------|-------|
| 1 | 0.844 | 2.73  |
| 2 | 1.164 | 1.88  |
| 3 | 1.199 | 95.39 |

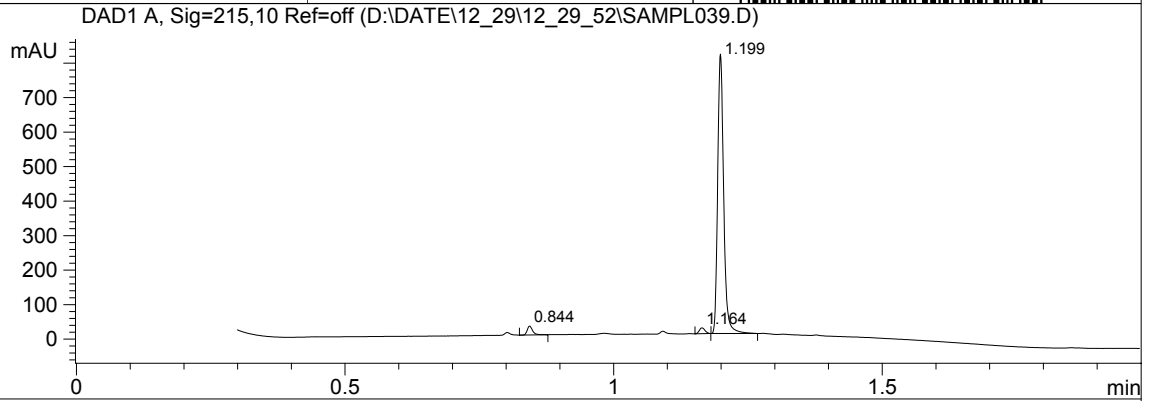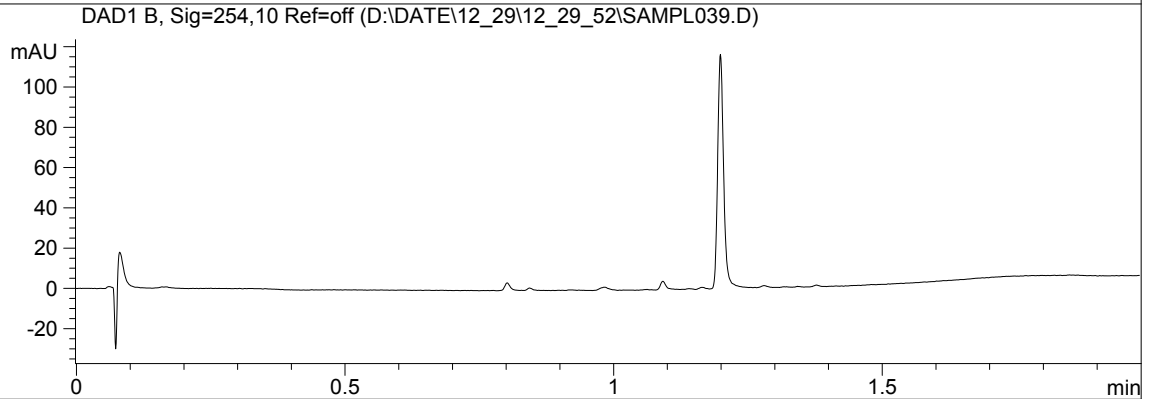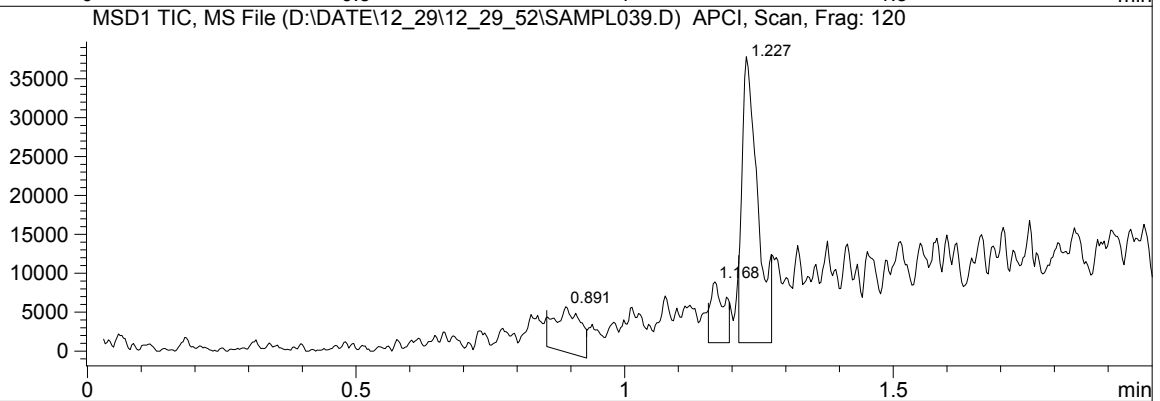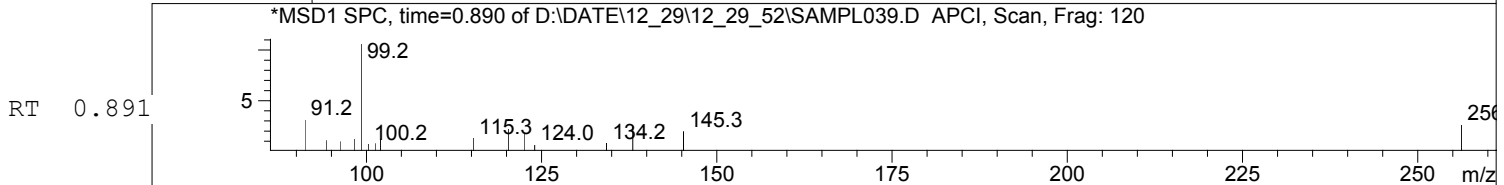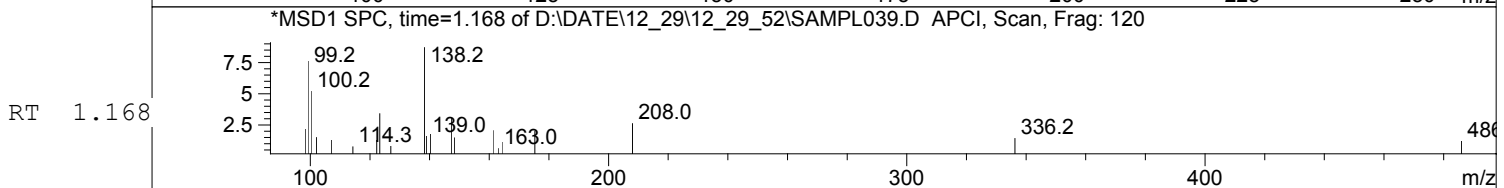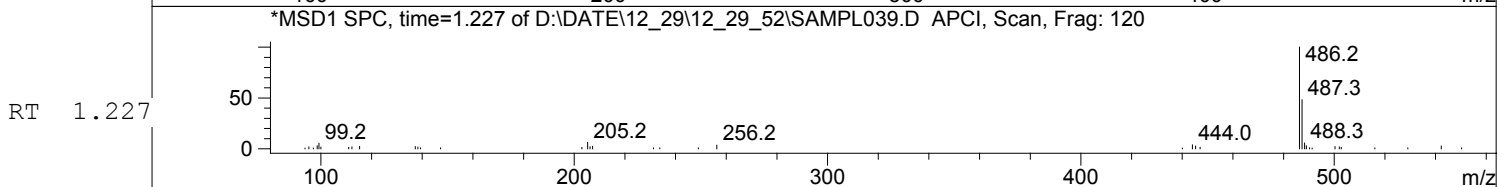

## Compound ID: 2

MaxPeak: 94.09%  
Ret\_Time: 0.740 min

2013129

OK

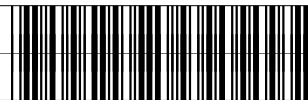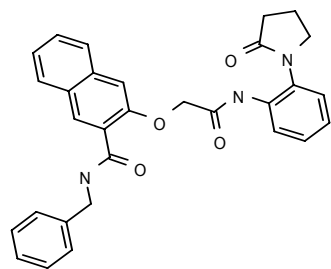

mw = 493.57

| # | Time  | Area% |
|---|-------|-------|
| 1 | 0.740 | 94.09 |
| 2 | 0.760 | 5.91  |

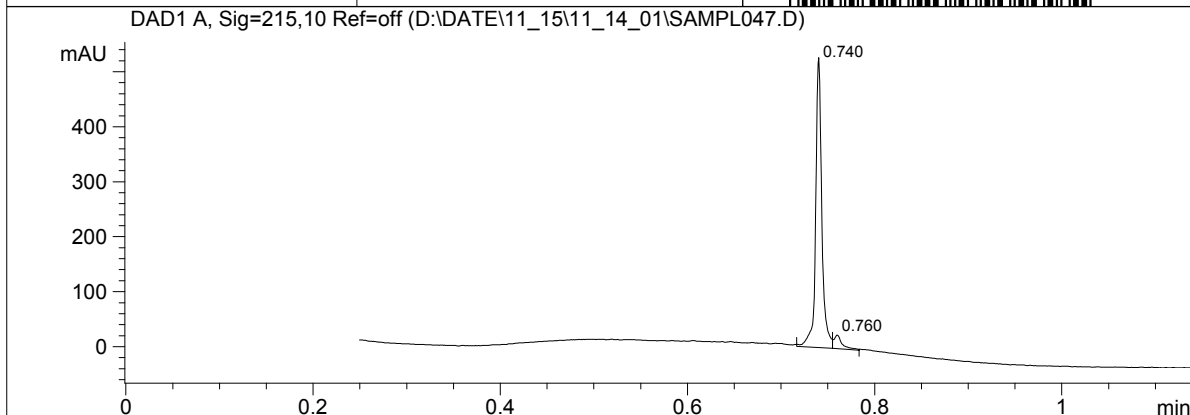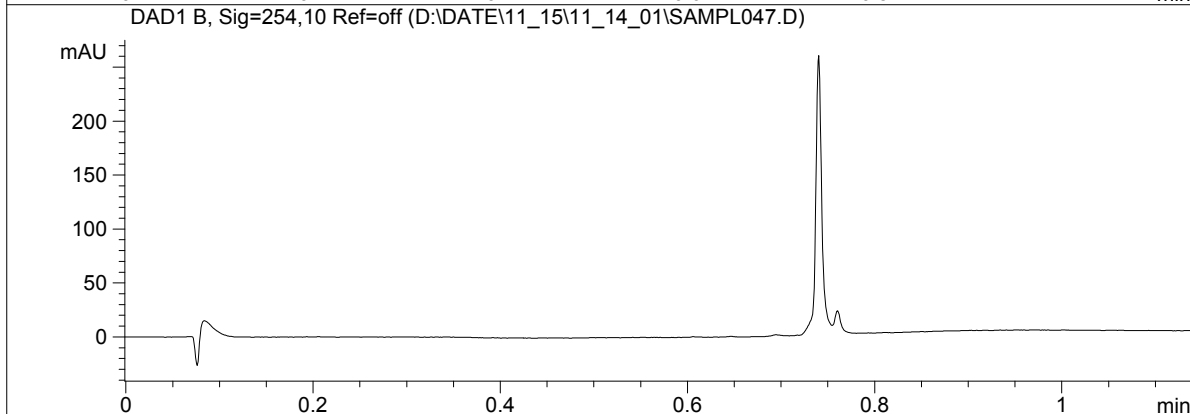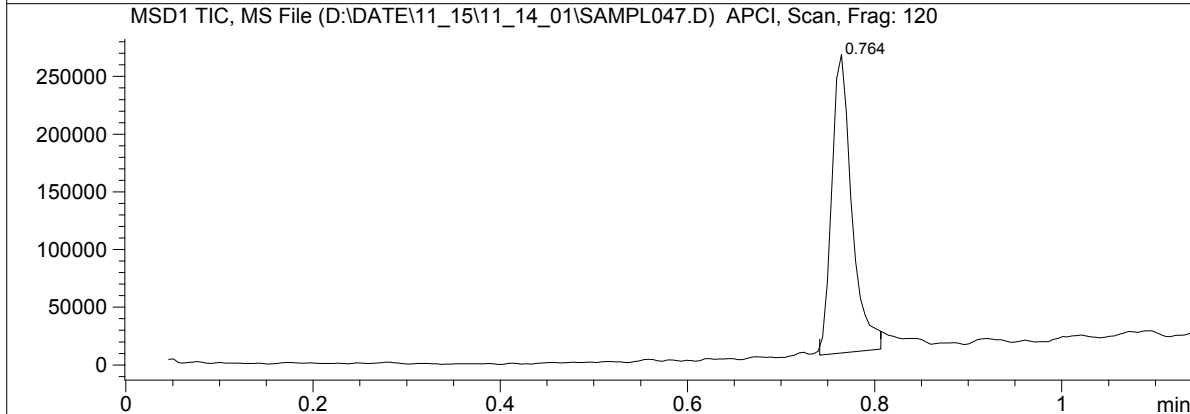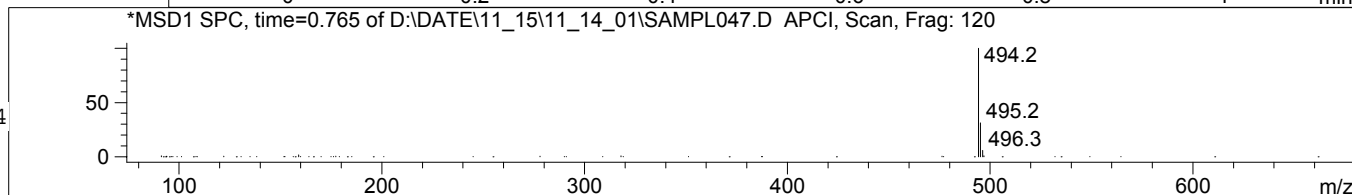

Compound ID: 3



MaxPeak: 100.00%  
Ret\_Time: 1.386 min

# 4532160

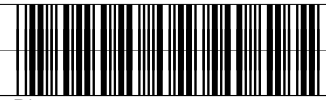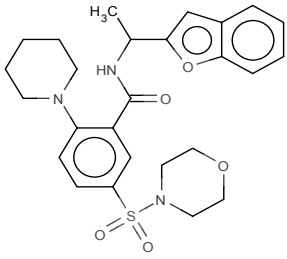

**Mol Wt** 497.606  
**Exact Mass** 497.23

| # | Time  | Area%  |
|---|-------|--------|
| 1 | 1.386 | 100.00 |

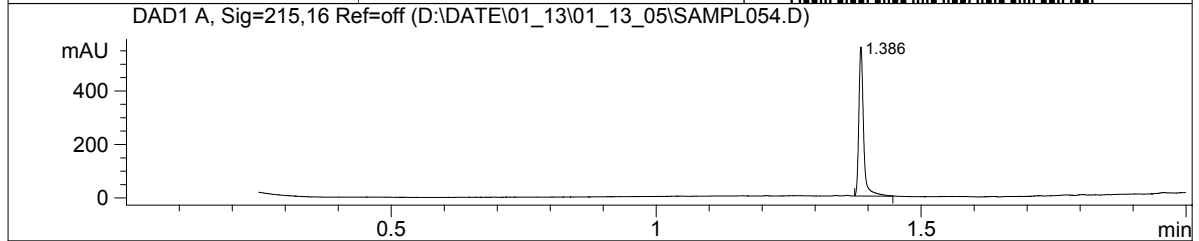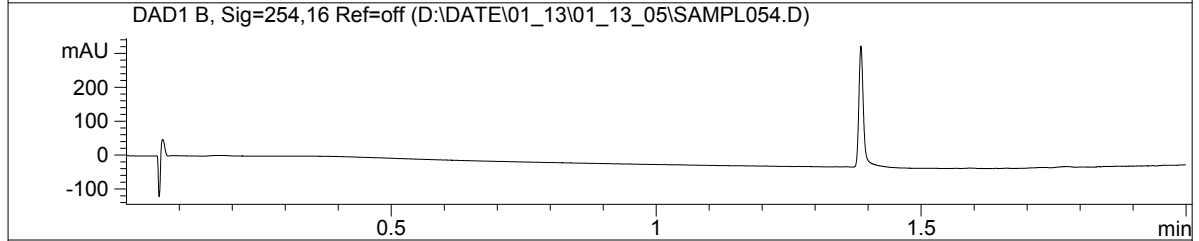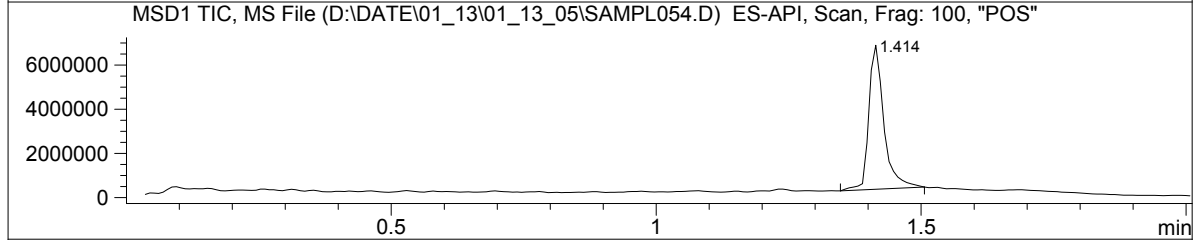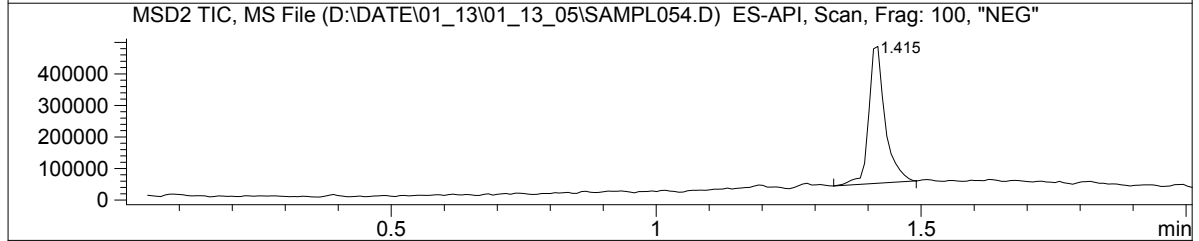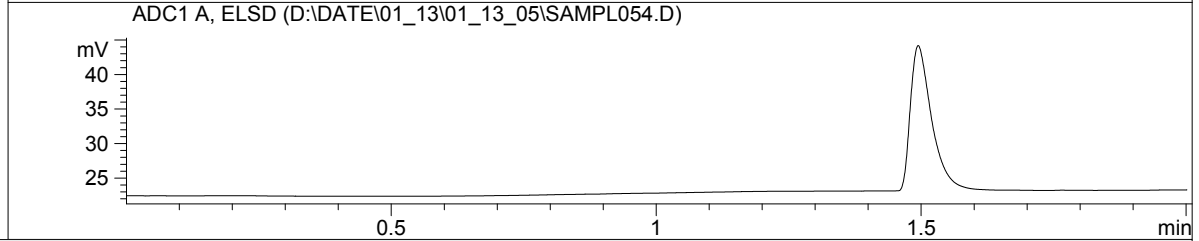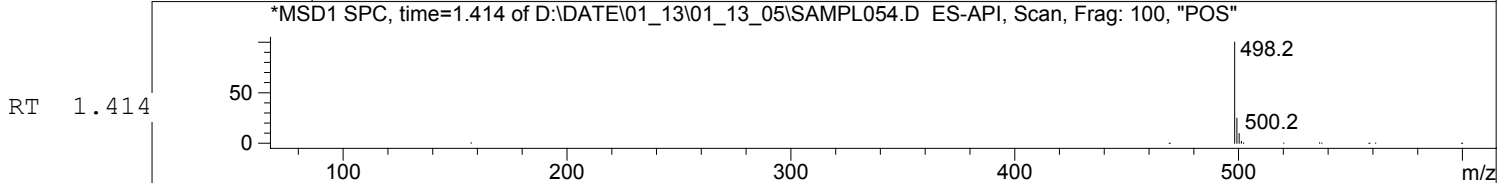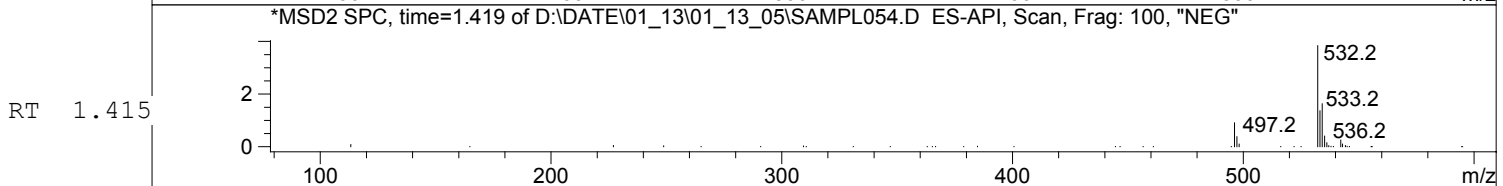

## Compound ID: 4

MaxPeak: 100.00%  
Ret\_Time: 1.133 min

# 4531970

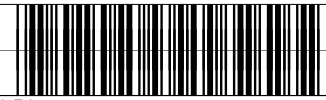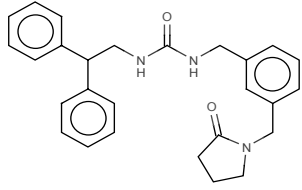

**Mol Wt** 427.538  
**Exact Mass** 427.27

| # | Time  | Area%  |
|---|-------|--------|
| 1 | 1.133 | 100.00 |

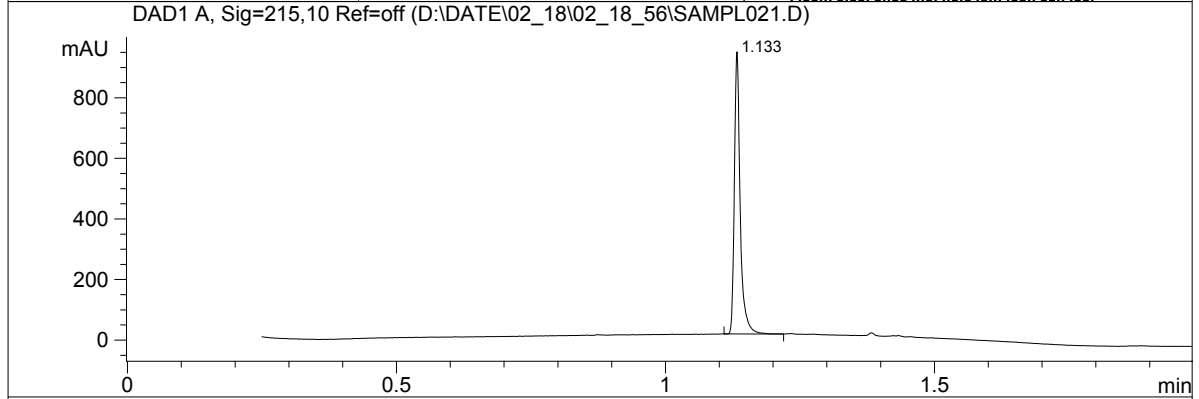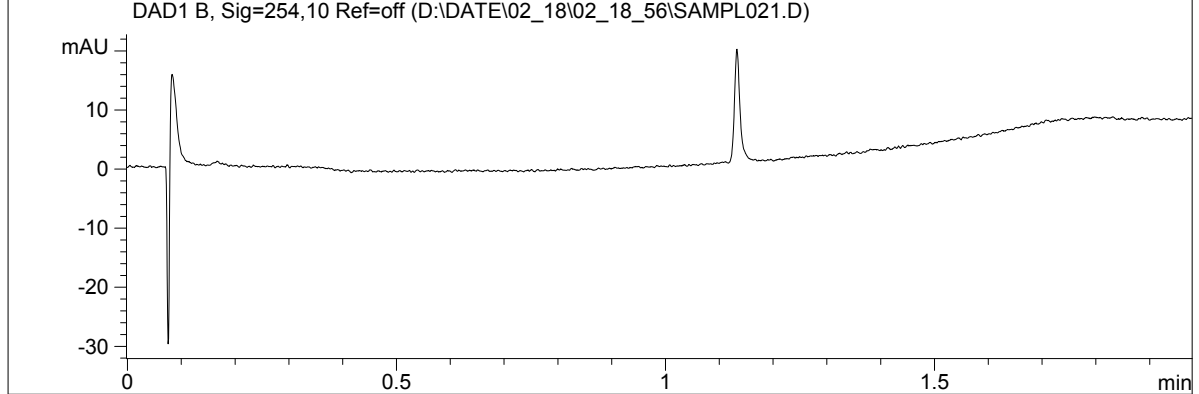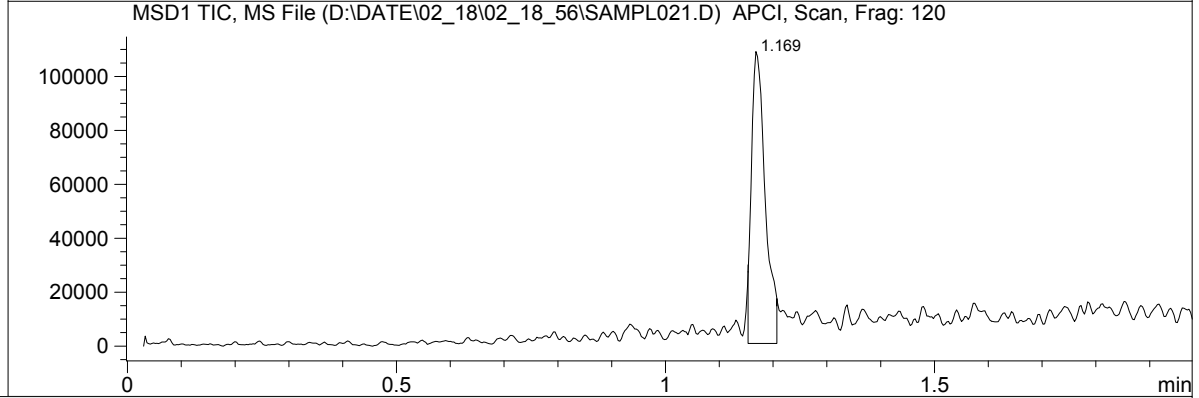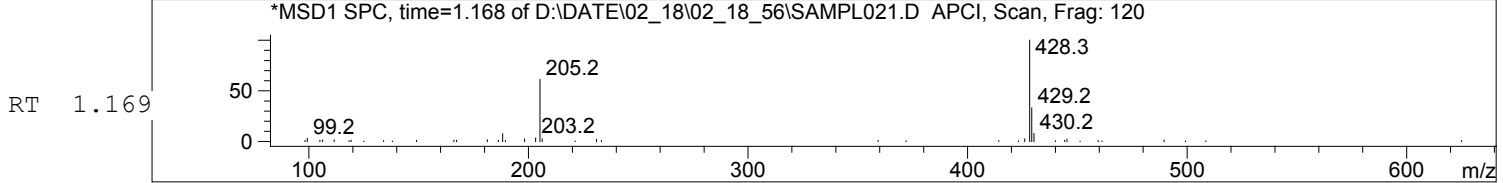

Compound ID: 5

MaxPeak: 91.31%  
Ret\_Time: 1.165 min

3390363\$2

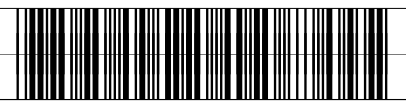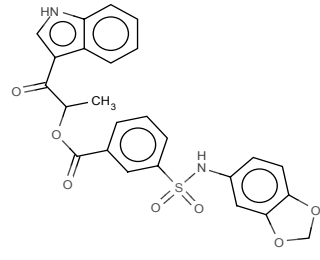

Mol Wt 492.5  
Exact Mass 492.1

| # | Time  | Area% |
|---|-------|-------|
| 1 | 1.165 | 91.31 |
| 2 | 1.309 | 2.31  |
| 3 | 1.322 | 2.91  |
| 4 | 1.389 | 3.48  |

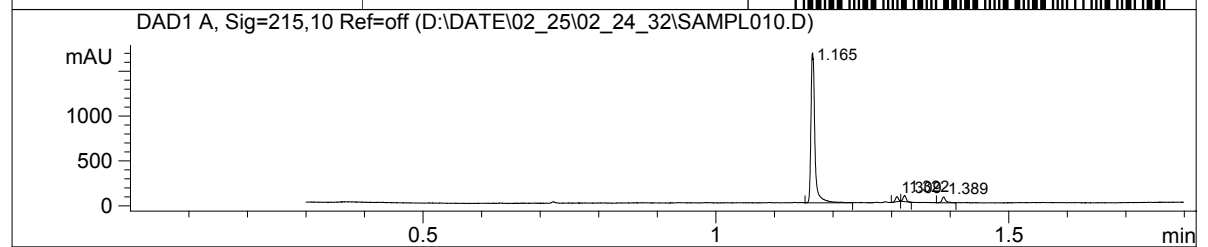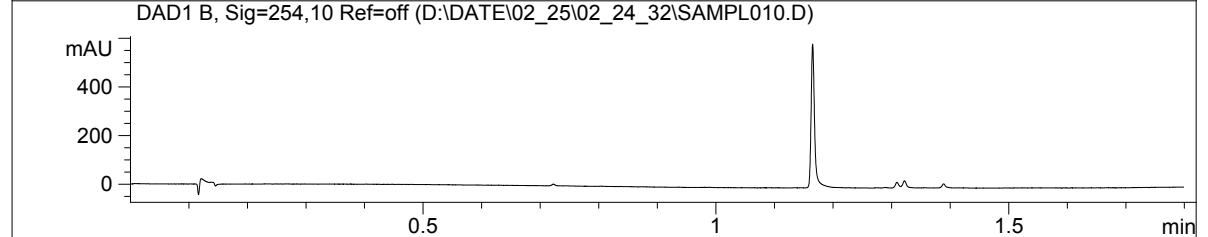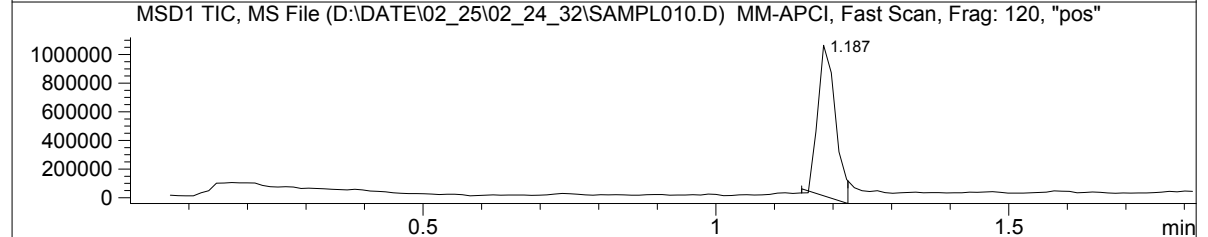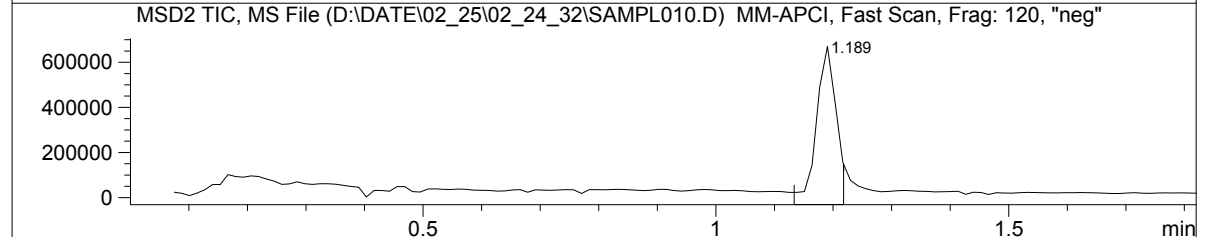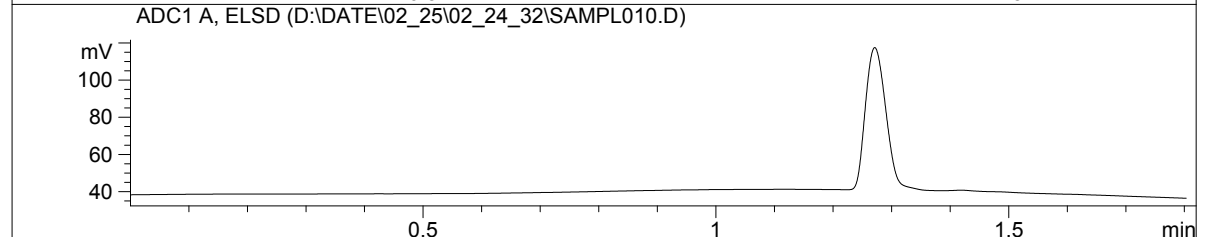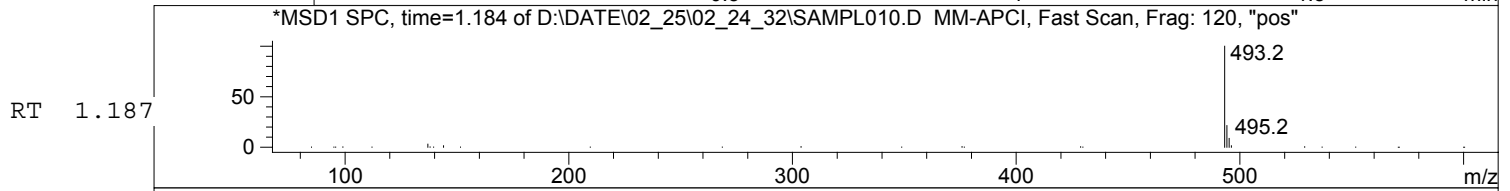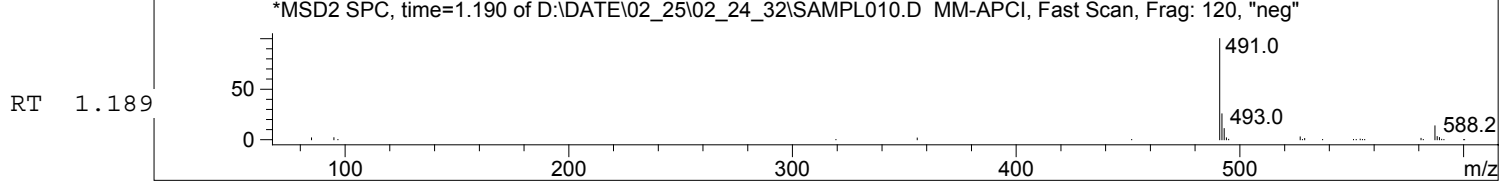

Compound ID: 6

MaxPeak: 95.13%  
Ret\_Time: 0.977 min

4531990

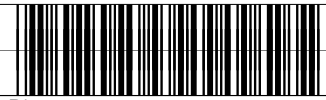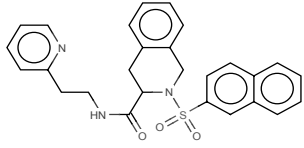

Mol Wt 471.571  
Exact Mass 471.19

| # | Time  | Area% |
|---|-------|-------|
| 1 | 0.977 | 95.13 |
| 2 | 1.096 | 1.15  |
| 3 | 1.153 | 1.15  |
| 4 | 1.175 | 2.56  |

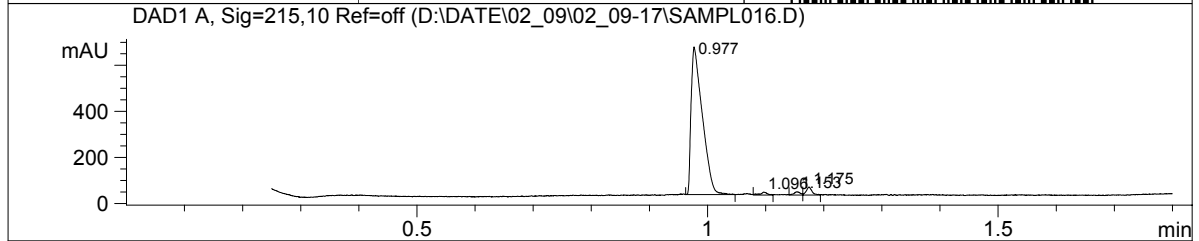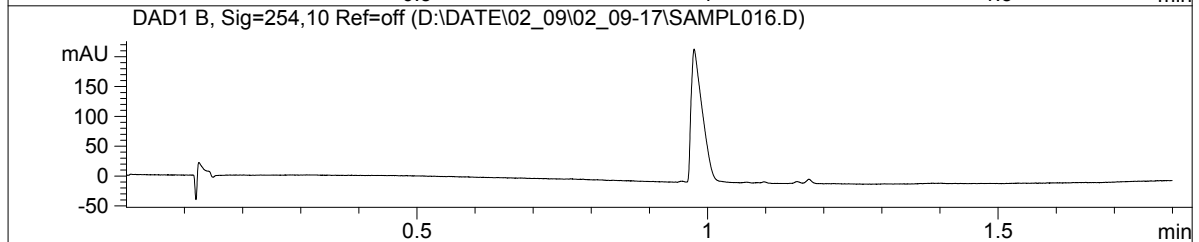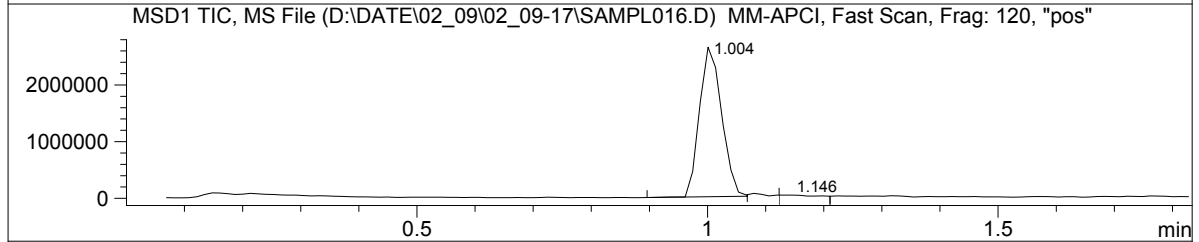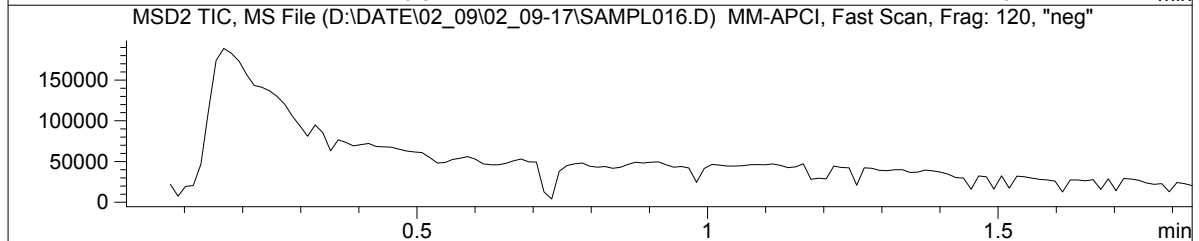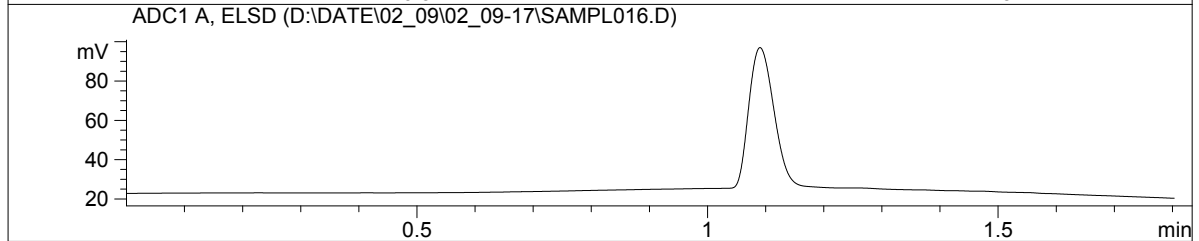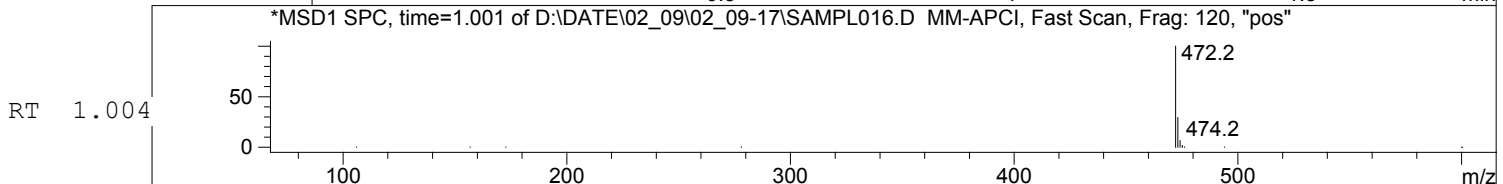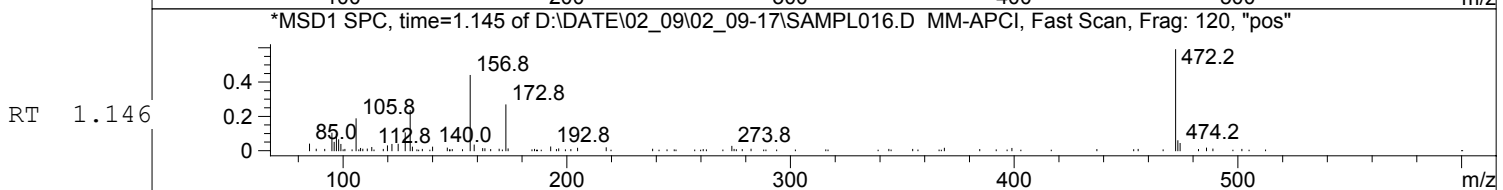

Compound ID: 7

MaxPeak: 93.22%  
Ret\_Time: 1.364 min

# 4532129

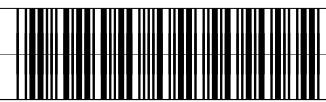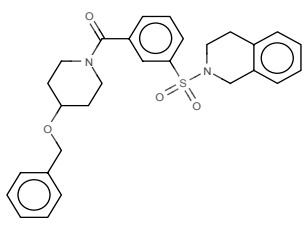

**Mol Wt** 490.614  
**Exact Mass** 490.23

| # | Time  | Area% |
|---|-------|-------|
| 1 | 1.078 | 3.92  |
| 2 | 1.247 | 1.58  |
| 3 | 1.309 | 1.28  |
| 4 | 1.364 | 93.22 |

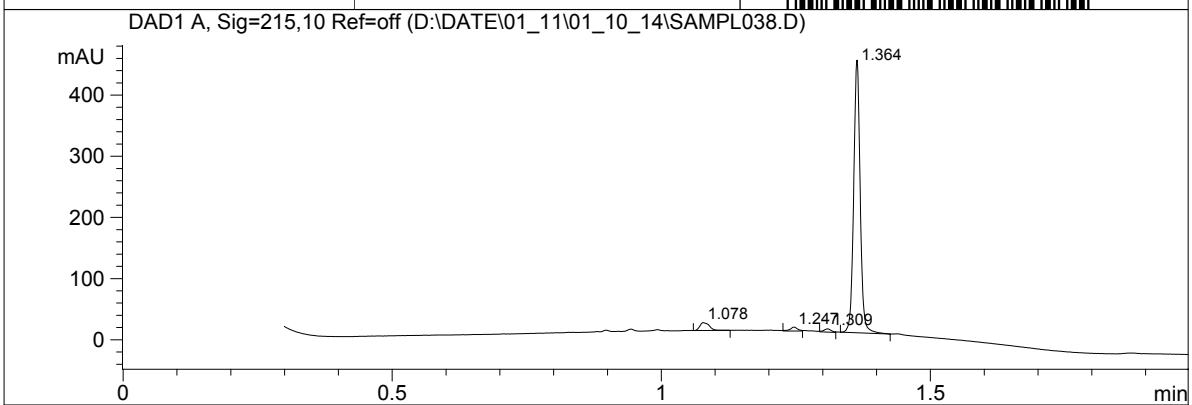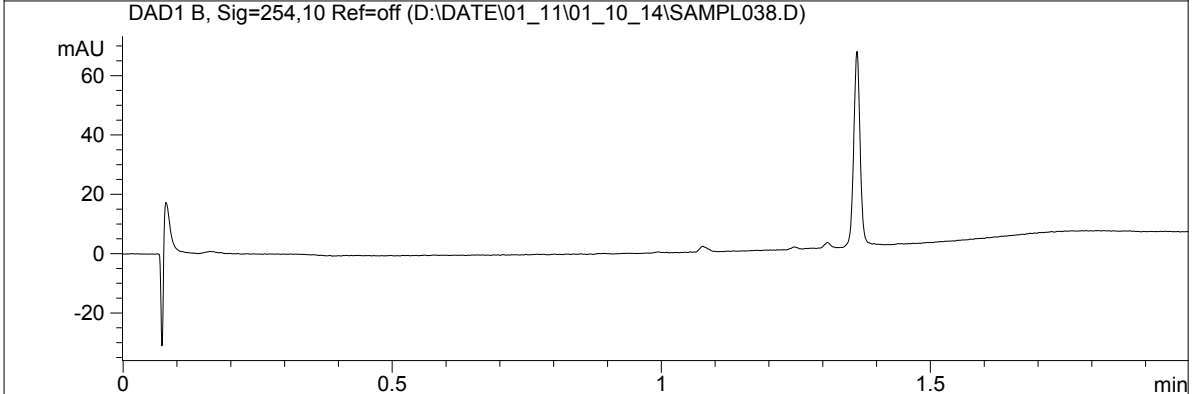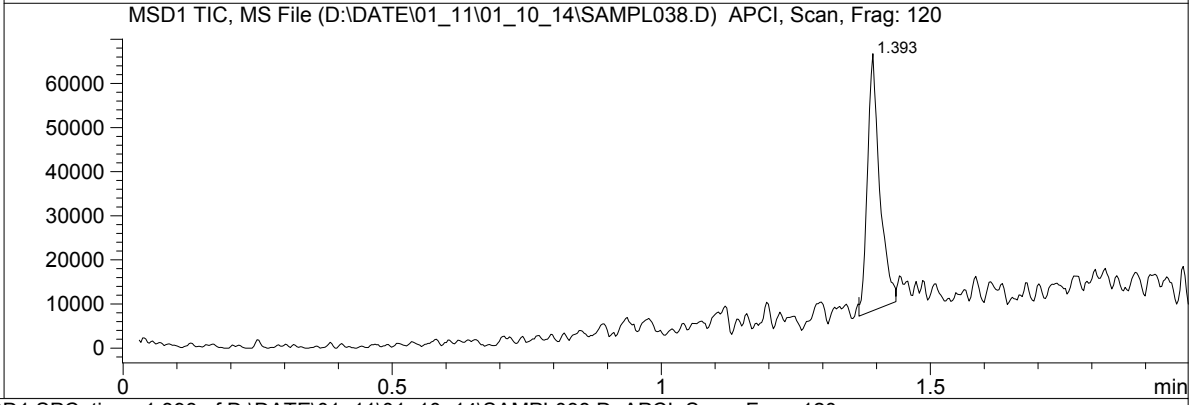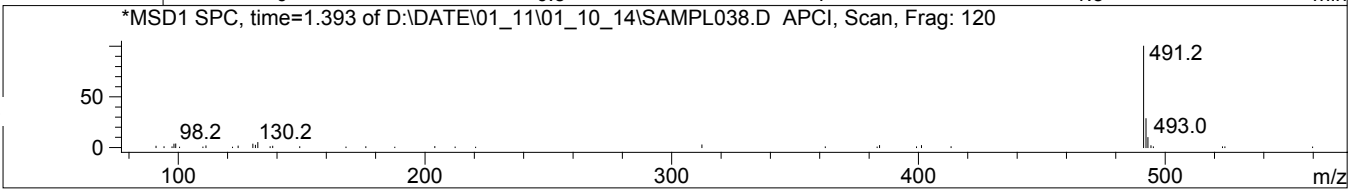

Compound ID: 8

MaxPeak: 100.00%  
Ret\_Time: 1.306 min

# 4532153

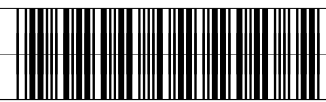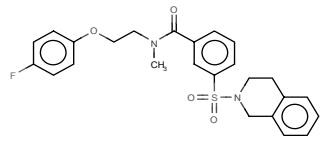

**Mol Wt** 468.54  
**Exact Mass** 468.18

| # | Time  | Area%  |
|---|-------|--------|
| 1 | 1.306 | 100.00 |

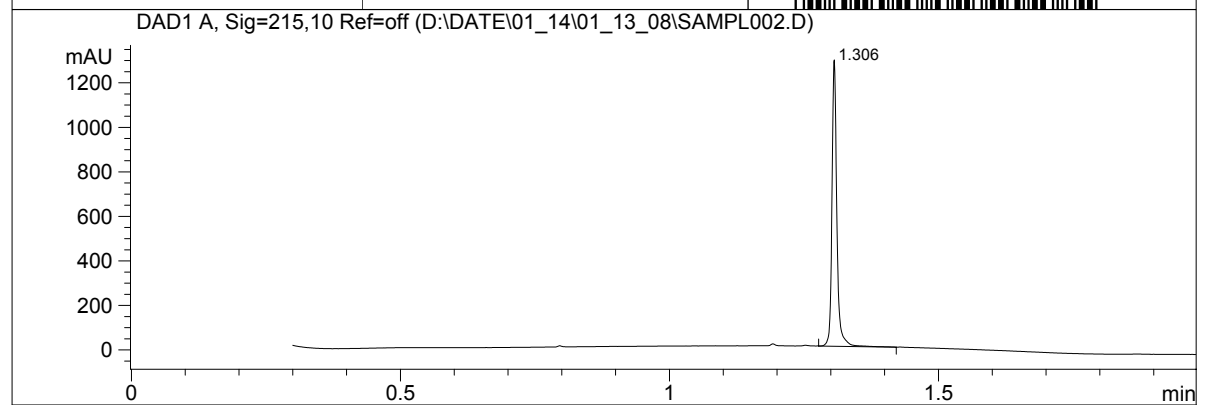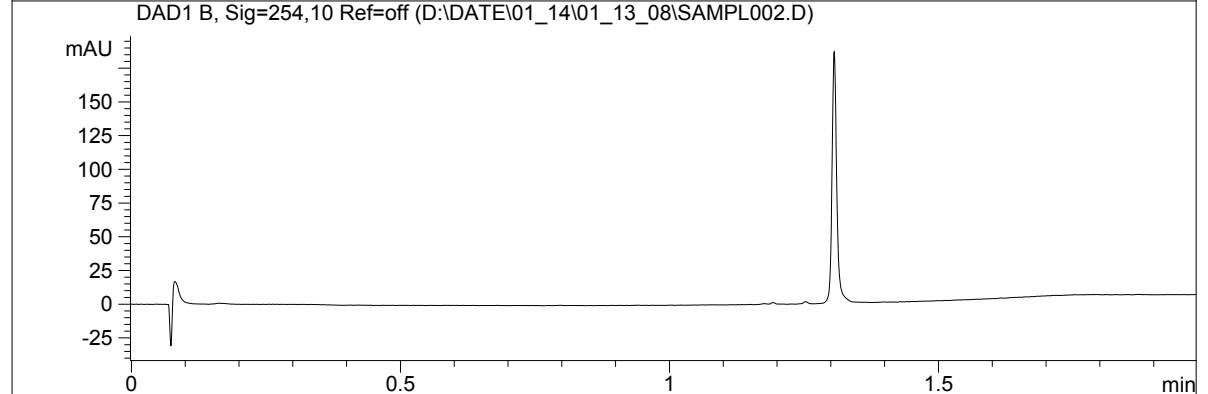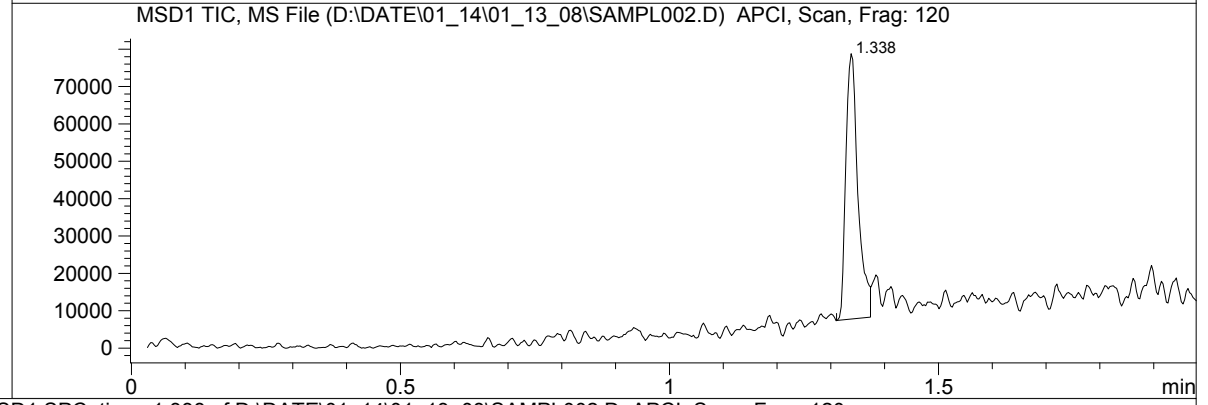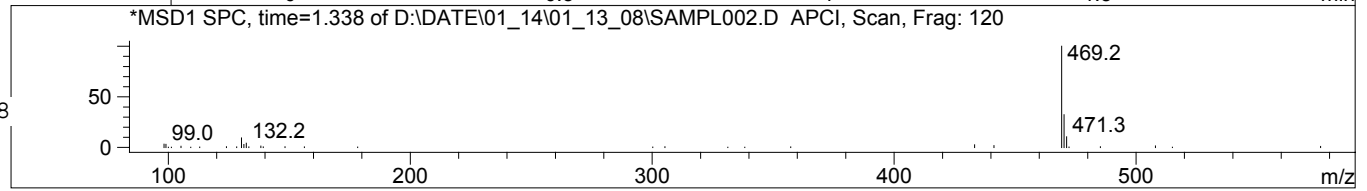

Compound ID: 9

MaxPeak: 97.97%  
Ret\_Time: 1.158 min

4532004

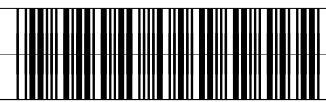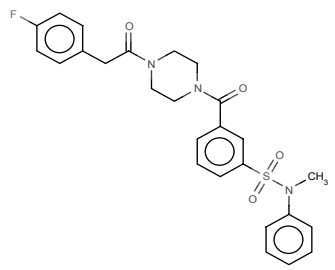

Mol Wt 495.566  
Exact Mass 495.19

| # | Time  | Area% |
|---|-------|-------|
| 1 | 0.718 | 2.03  |
| 2 | 1.158 | 97.97 |

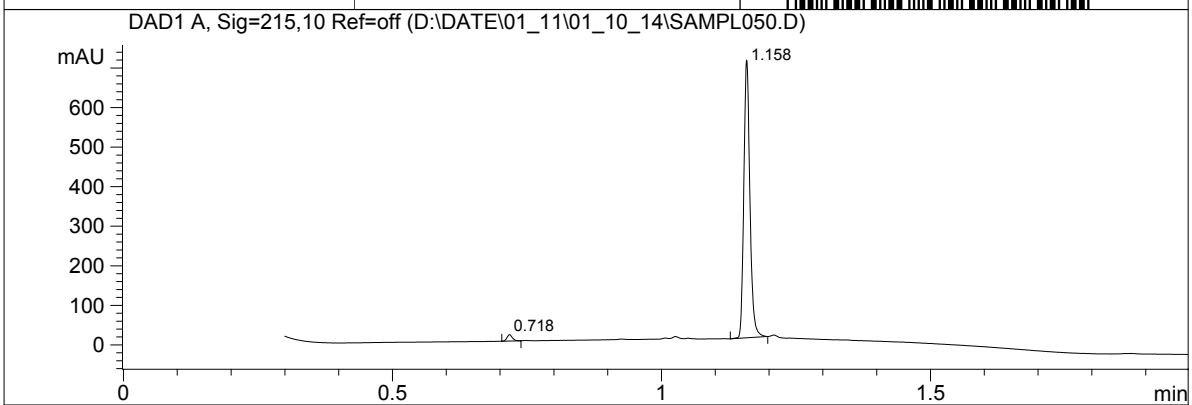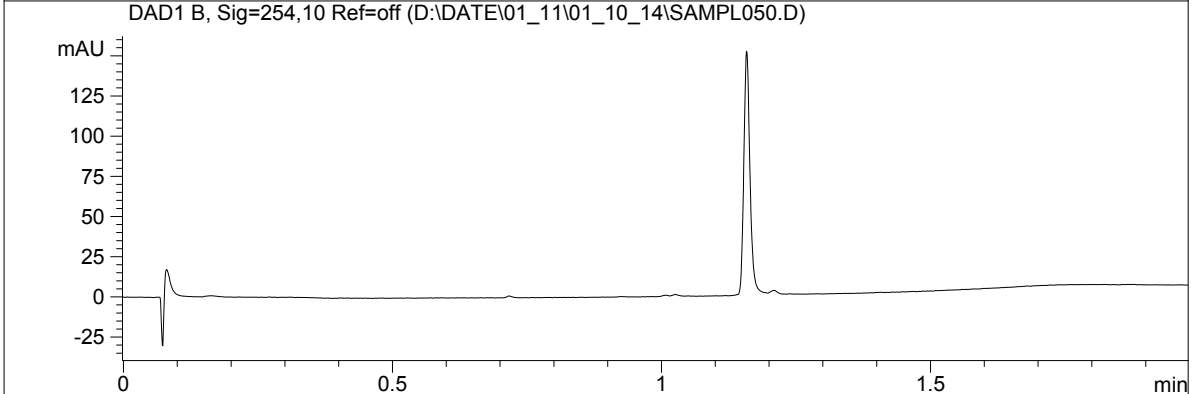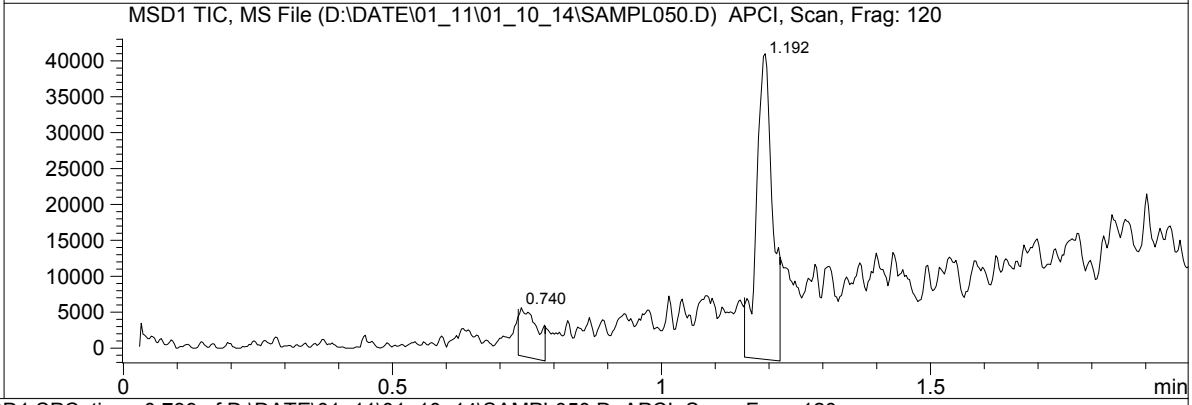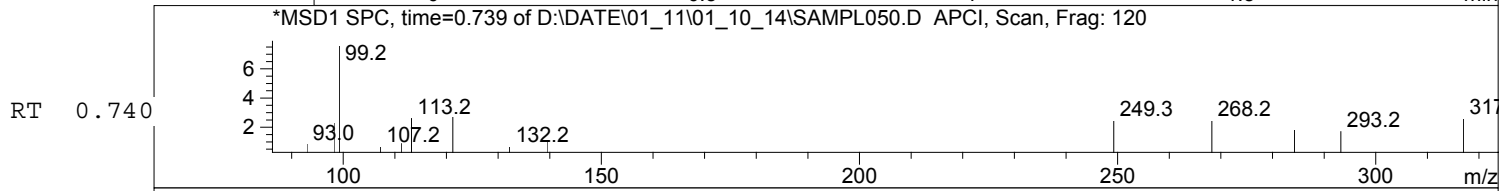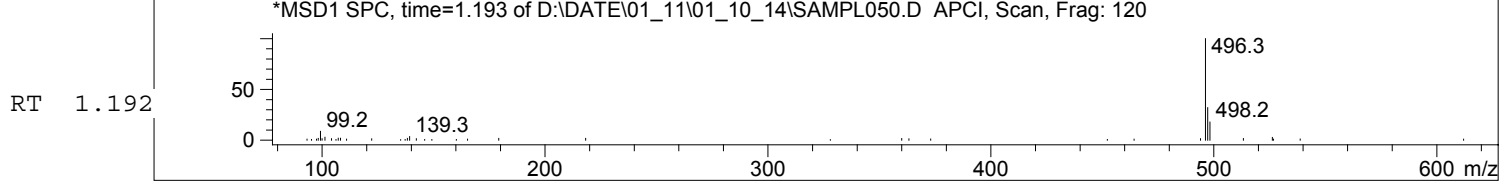

Compound ID: 10

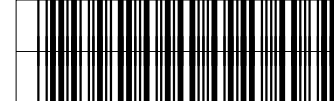

MaxPeak: 97.65%  
Ret\_Time: 0.731 min

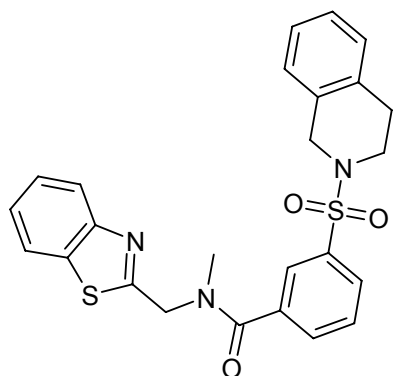

mw = 477,61

| # | Time  | Area% |
|---|-------|-------|
| 1 | 0.696 | 2.35  |
| 2 | 0.731 | 97.65 |

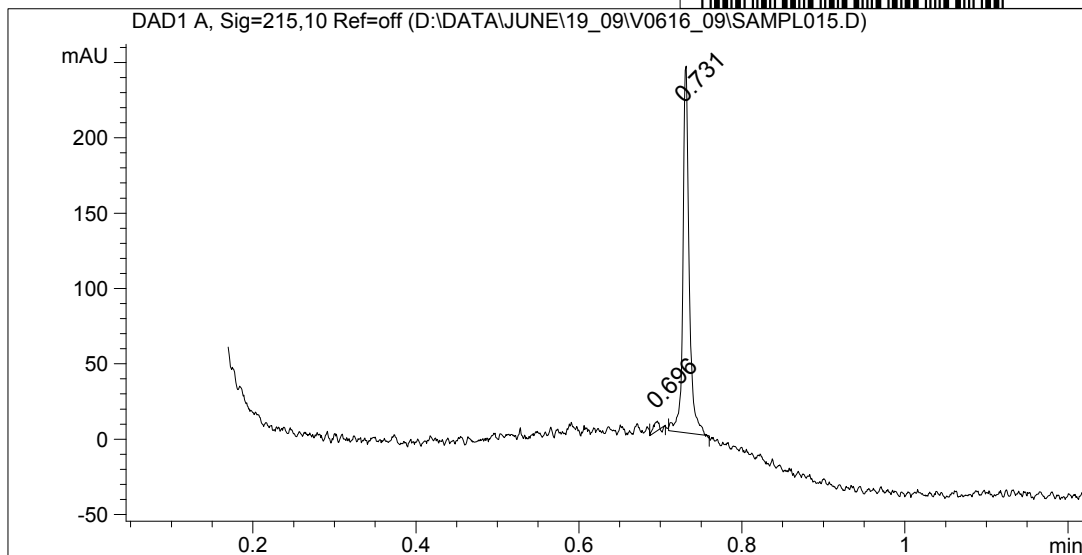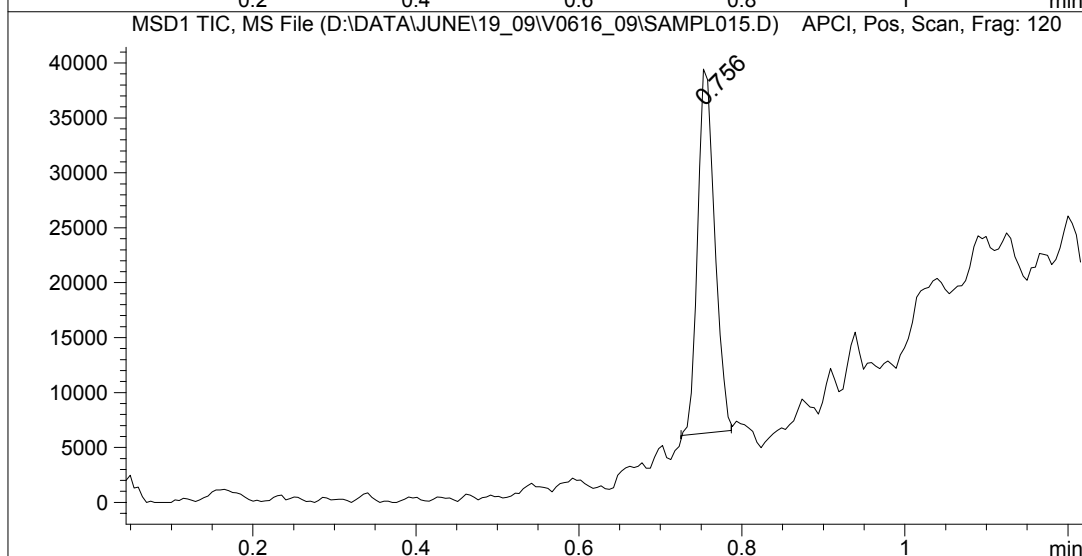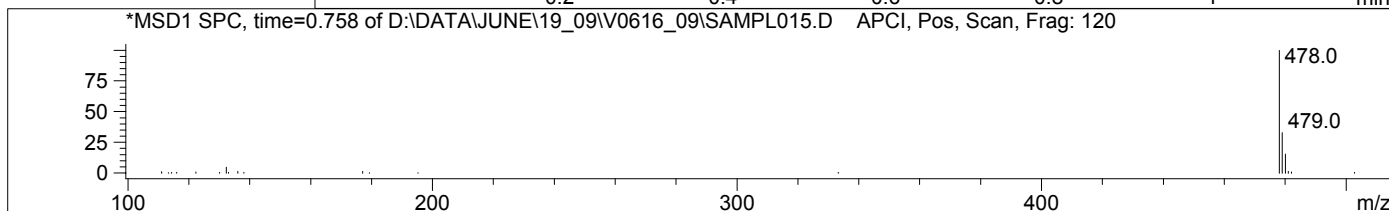

Compound ID: 11



MaxPeak: 96.68%  
Ret\_Time: 1.317 min

4532022

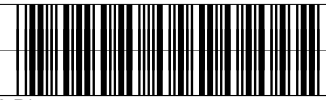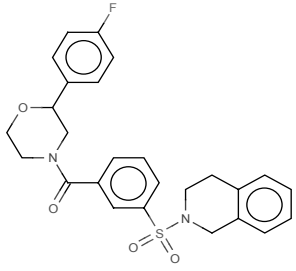

Mol Wt 480.551  
Exact Mass 480.18

| # | Time  | Area% |
|---|-------|-------|
| 1 | 0.752 | 1.71  |
| 2 | 1.079 | 1.61  |
| 3 | 1.317 | 96.68 |

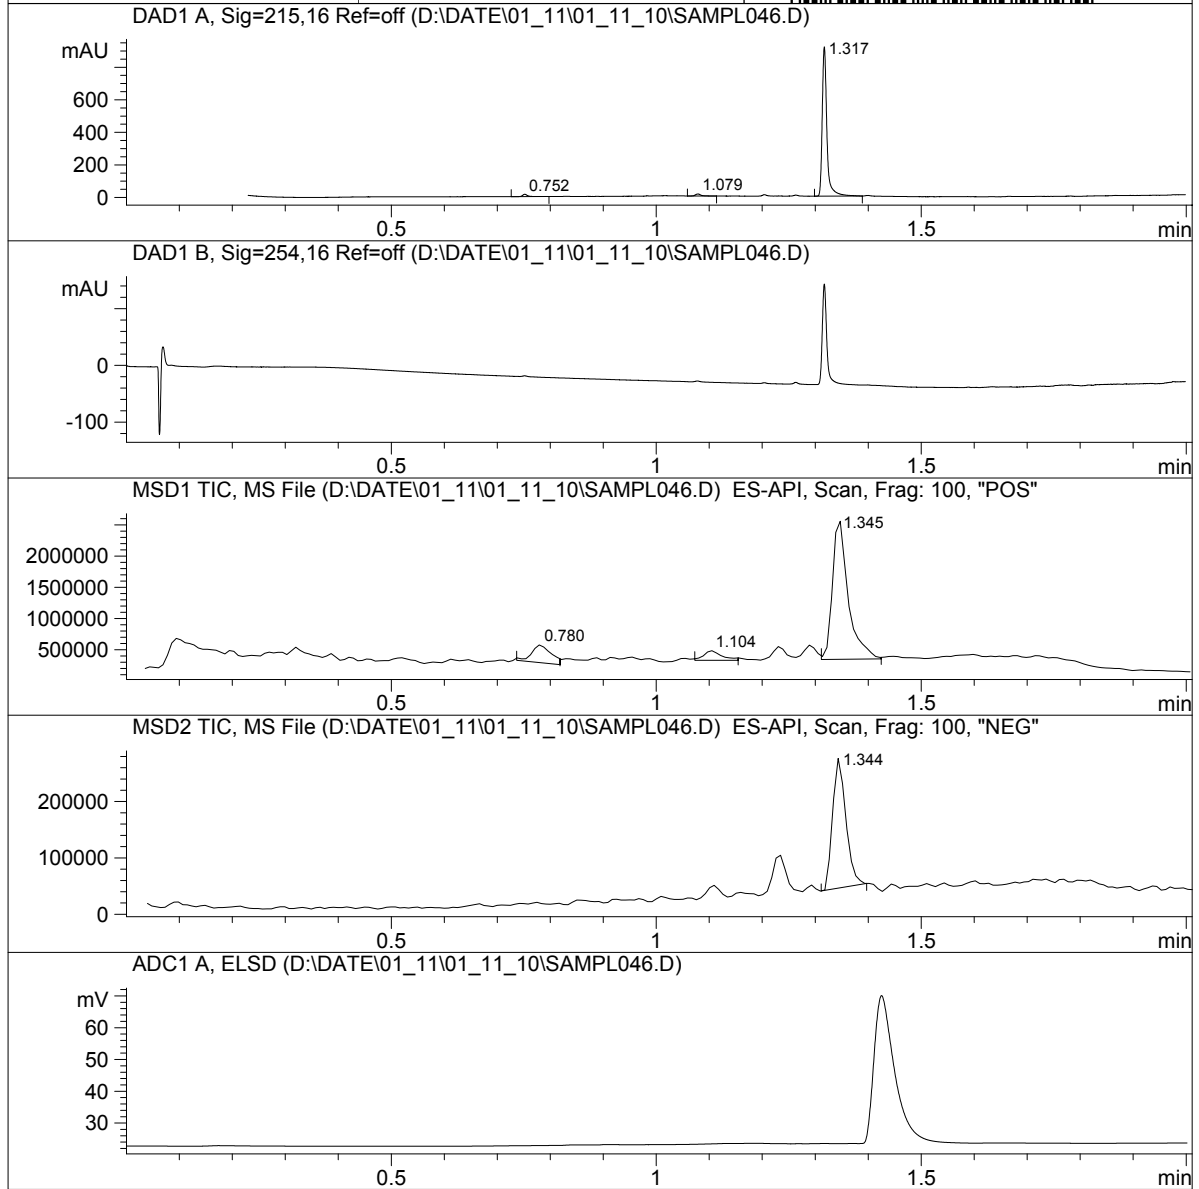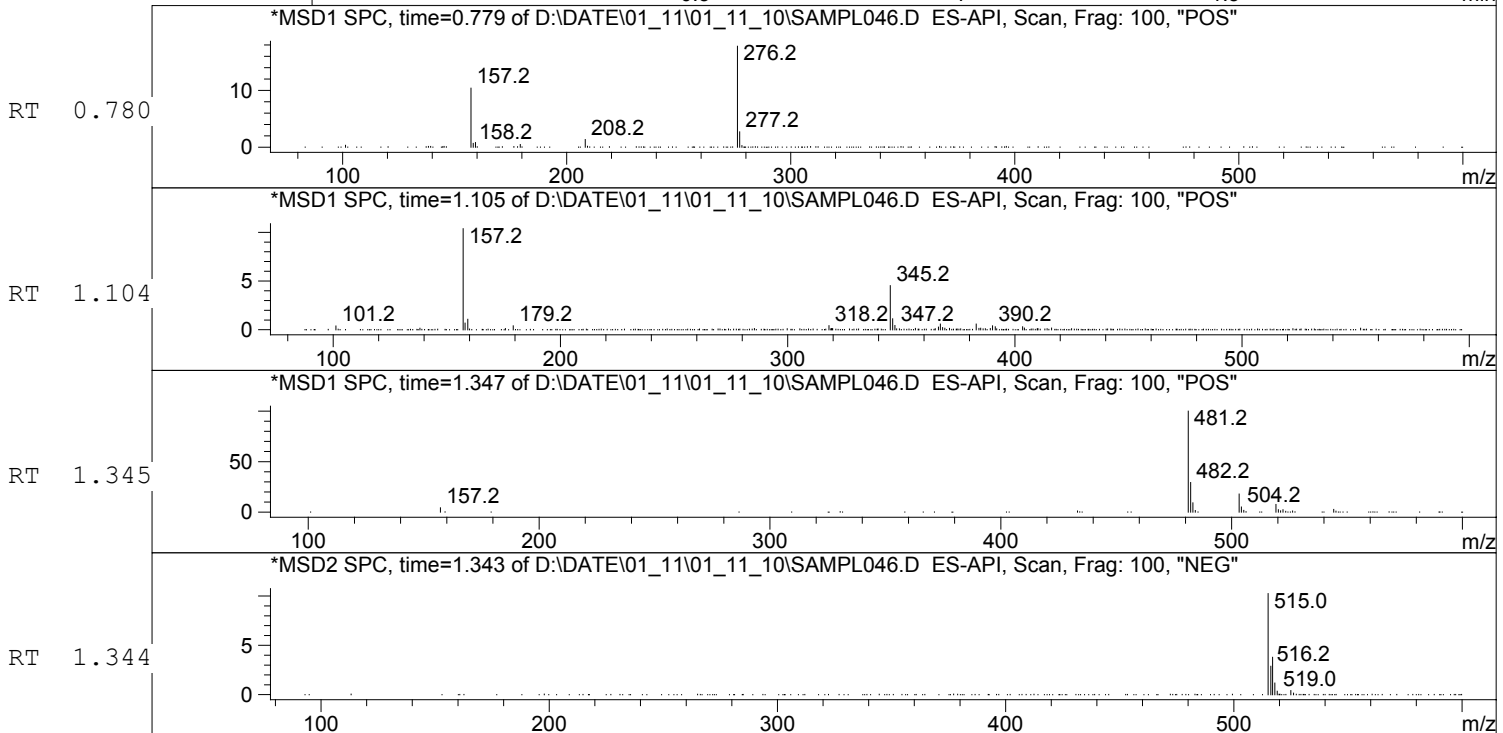

Compound ID: 12

MaxPeak: 94.66%  
Ret\_Time: 1.240 min

# 4532001

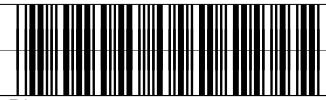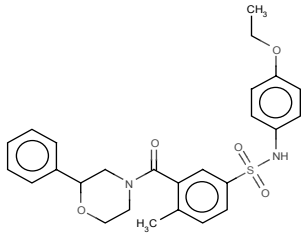

**Mol Wt** 480.576  
**Exact Mass** 480.2

| # | Time  | Area% |
|---|-------|-------|
| 1 | 1.009 | 1.14  |
| 2 | 1.240 | 94.66 |
| 3 | 1.267 | 4.19  |

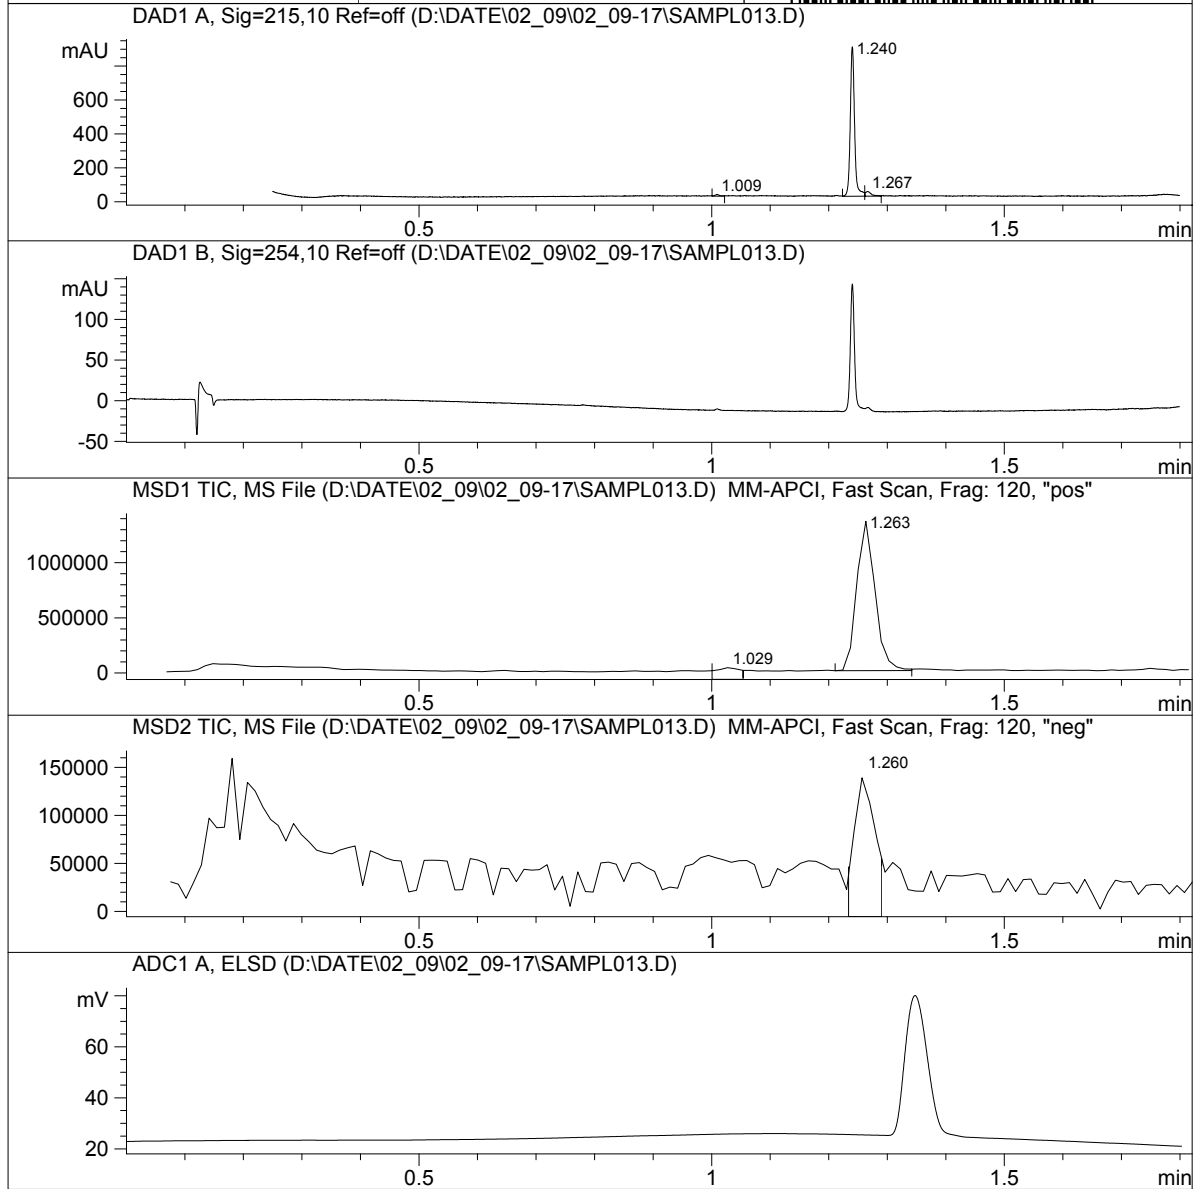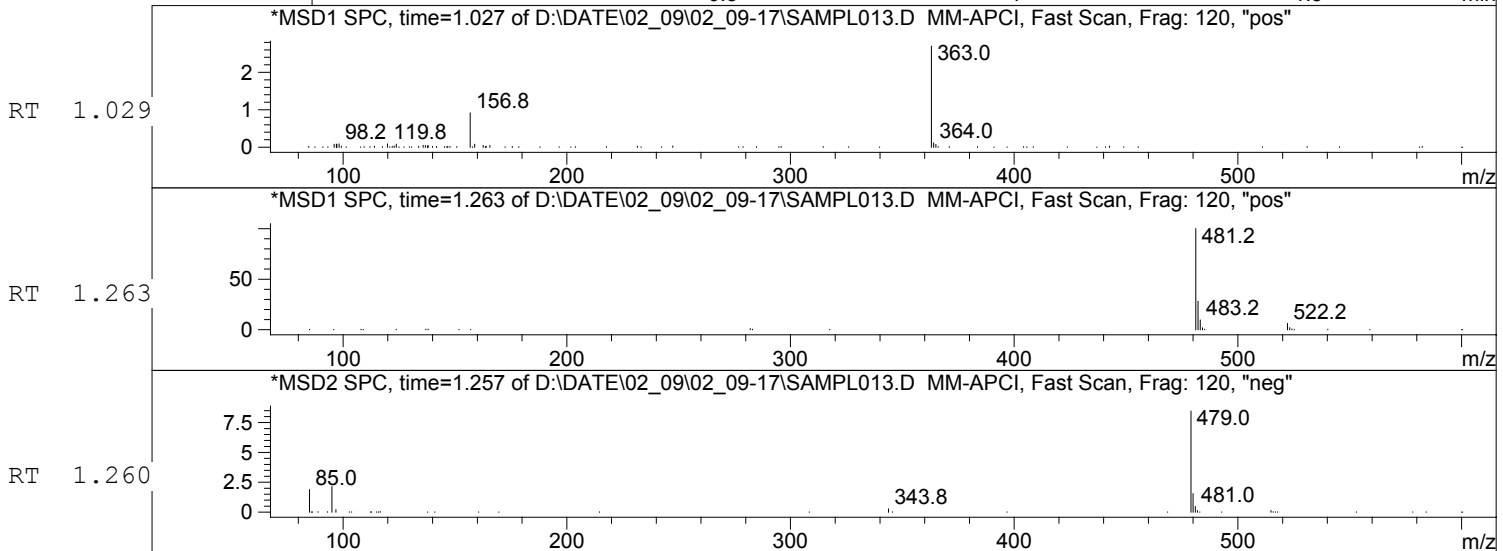

## Compound ID: 13

MaxPeak: 100.00%  
Ret\_Time: 0.888 min

# 4532099

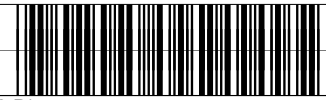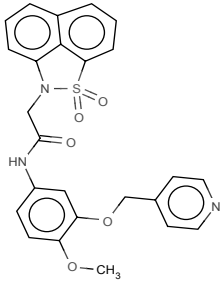

**Mol Wt** 475.516  
**Exact Mass** 475.13

| # | Time  | Area%  |
|---|-------|--------|
| 1 | 0.888 | 100.00 |

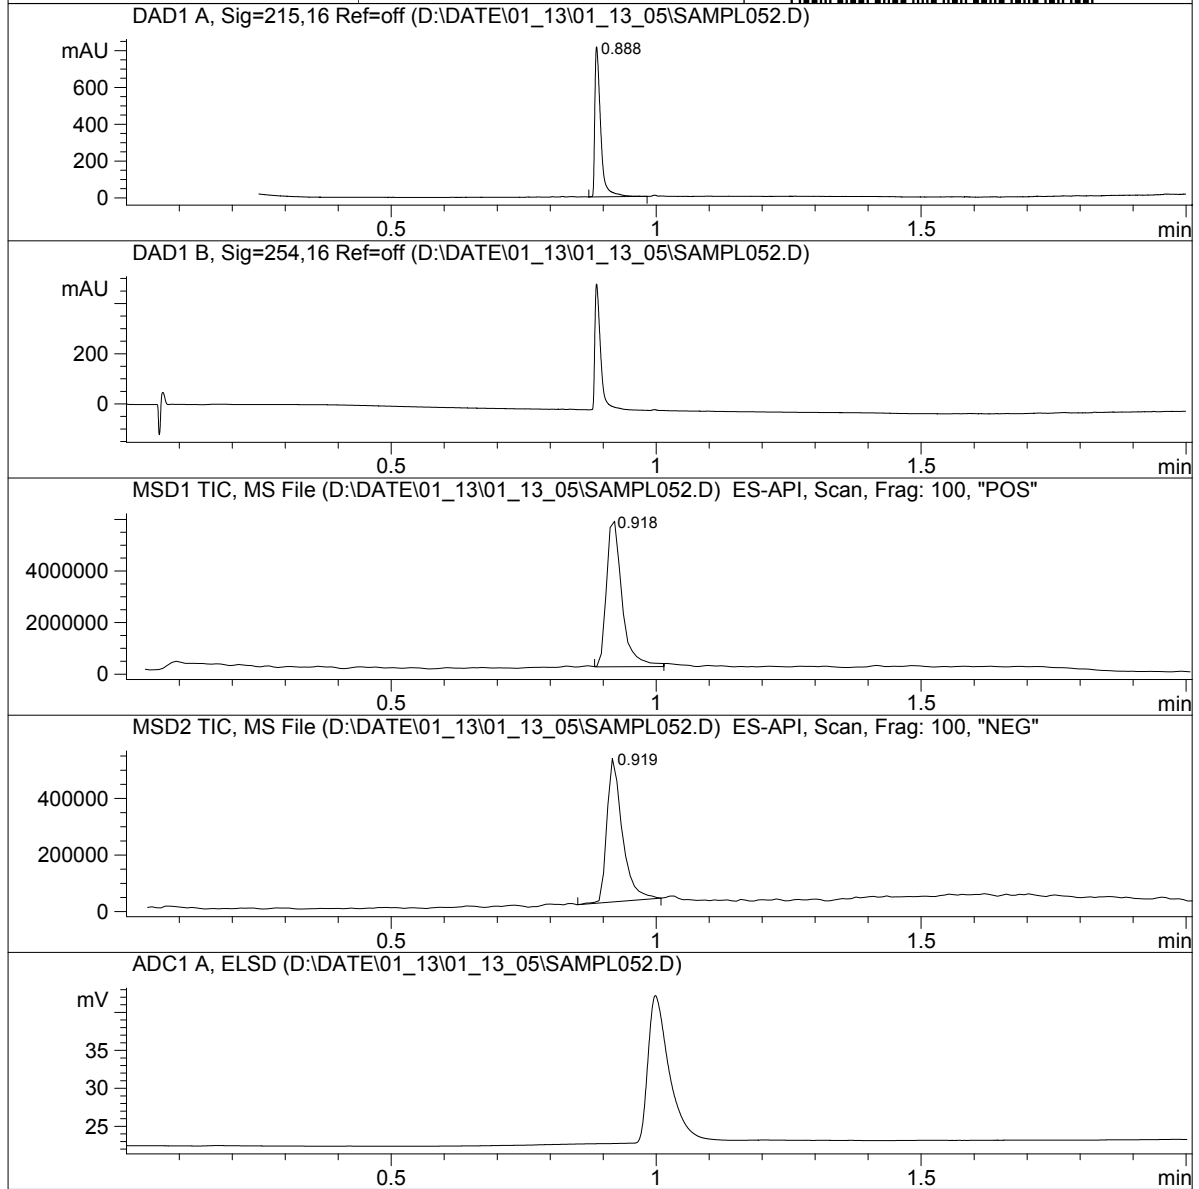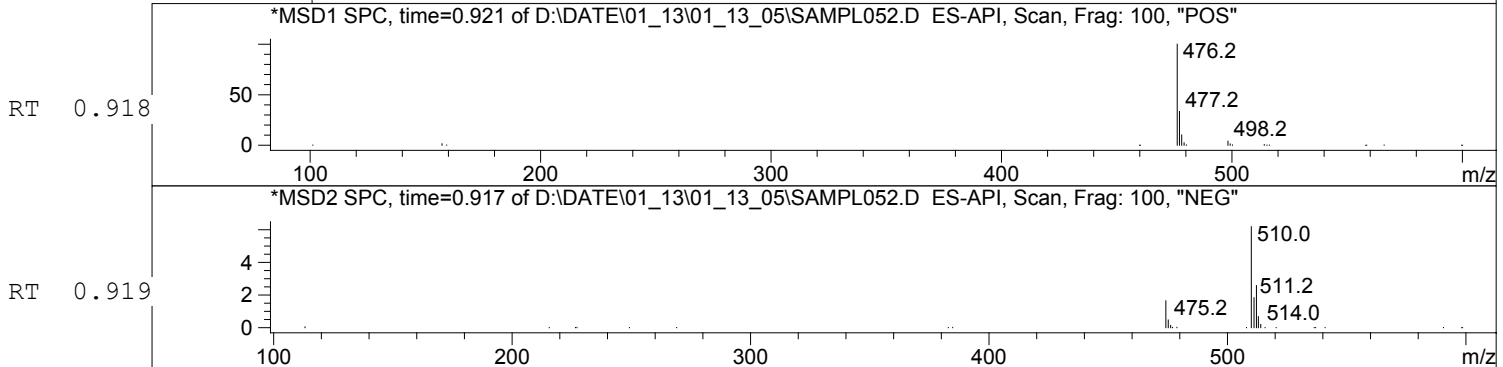

## Compound ID: 14
